# Supplementary material for: Malnutrition among the older adult: an additional challenge for the rehabilitation team-insights of a small population of Switzerland
Source: Frontiers journal article supplement (doi:10.3389/fpubh.2024.1436566), 2024-07-09
Supplement: Data_Sheet_1.docx [file Data_Sheet_1.docx]

Supplementary Material

# Supplementary Figures and Tables

For more information on Supplementary Material and for details on the different file types accepted, please see [here](https://www.frontiersin.org/guidelines/author-guidelines#supplementary-material).

## Supplementary Figures

The figure legends are required to have the same font as the main text, 12 point normal Times New Roman, single spaced. Please use a single paragraph for each legend and prepare the figures keeping in mind the PDF layout.

**Supplementary Figure 1.**

Figure 1. Comparison of MNA score by gender

**Supplementary Figure 2.**

Figure 2. Duration of rehabilitation (expressed in days) in the different MNA score groups

**Supplementary Figure 3.**

Figure 3. Average BMI values in different MNA score groups

**2.2. Supplementary Tables**

**Supplementary Table 1.**

Table 1. Basic sociodemographic characteristics of the participants

| **Characteristics** | **N** | **%** |
| --- | --- | --- |
| **Gender** |
| women | 234 | 65.5 |
| men | 123 | 34.5 |
| **Age** |  |  |
| 61-70 | 15 | 4.2 |
| 71-80 | 87 | 24.4 |
| 81-90 | 207 | 58 |
| 90 | 48 | 13.4 |
| **Average age** | 83.6 | |
| **Habitation** |  |  |
| home environment | 293 | 82.1 |
| institution (nursing home) | 64 | 17.9 |
| **Marital status** |  |  |
| married | 123 | 34.4 |
| divorced | 20 | 5.6 |
| unmarried | 27 | 7.6 |
| widowed | 187 | 52.4 |

N – number of participants, % - percentage of participants

**Supplementary Table 2.**

Table 2. Values of the MNA scores achieved

| **MNA score** | **N** | **%** |
| --- | --- | --- |
| 17 | 111 | 31.1 |
| 17-23.5 | 128 | 35.8 |
| 24 | 118 | 33.1 |

MNA – Mini Nutritional Assessment score, N – number of participants, % - percentage of participants

**Supplementary Table 3.**

Table 3. The average values of BMI and rehabilitation days of the participants

|  | **Mean** | **SD** |
| --- | --- | --- |
| BMI | 24.4 | 4.8 |
| rehabilitation length / day | 20.4 | 6.8 |

BMI – body mass index, Mean – average of a data set, SD – standard deviation
